# Supplementary material
Source: publisher figshare collection journal article supplement (https://gsapubs.figshare.com/articles/dataset/_/23900184)
Supplement: Supplementary file 1 [file 1]

## Sheet: Sheet1
Sample Number	Field	Location	Latitude		Longitude		Latitude (decimal)	Longitude (decimal)	Elevation (m)	Age	Sediment type	Ice basal regime	Unit	BET (m2g-1)	Grain_size_mode	Clay%	Silt%	Mud%	Sand%	Gravel%	MINERALOGY (%)	Plagioclase	K-spar	Quartz	Pyroxene	Amphibole	Epidote	Cordierite	Mica	Illite	Chlorite	Smectite	Vermiculite	Palygorskite	Serpentine	Zeolite	Kaolinite	Accessory minerals	Pyrophyllite	Clinozoisite	Olivine	Cristobalite	Amorphous	R	WIP	V	CIA	CIW	PIA
122612-2	Antarctica	Taylor Valley					-77.6234	162.898	108	Modern	Water track		Bonney Drift (, Taylor II)	15.67	49.4	3.65947	96.3405	1.01067	92.7636	6.2257		24.6	5.3	8.5	13.3	4.9	0	5.4	11.2	10.1	7	9.7	0	0	0	0	0	0	0	0	0	0	0	5.0706	67.4556	0.73179	54.5355	58.7947	55.3039
122612-1	Antarctica	Taylor Valley					-77.6232	162.898		Modern	Water track			5.439	3.05	49.9403	50.0597	3.42609	85.2752	11.2987		22.5806	4.8387	7.4597	5.8468	4.3347	0	3.9315	0	34.5766	8.0645	5.9476	0	0	0	2.4194	0	0	0	0	0	0	0
011213-12	Antarctica	Taylor Valley					-77.638	162.885		Modern	Water track			8.672	31.6	15.4881	84.5119	0.3288	82.4224	17.2488		29.2707	7.2927	9.7902	15.7842	2.4975	0	0	14.3856	11.1888	7.6923	2.0979	0	0	0	0	0	0	0	0	0	0	0
122512-13	Antarctica	Taylor Valley					-77.5757	163.492		Modern	Water track			63.801	3.11	37.5742	62.4258	0.766928	92.8482	6.38489		29.97	9.2907	6.4935	4.7952	1.3986	0	2.2977	19.7802	12.7872	7.8921	5.2947	0	0	0	0	0	0	0	0	0	0	0
122412-1	Antarctica	Taylor Valley					-77.5782	163.542		Modern	Water track			60.389	53.9	1.82438	98.1756	2.04853	89.7517	8.19974		34.6346	20.9209	6.5065	5.7057	4.1041	0	3.6036	14.9149	8.008	1.6016	0	0	0	0	0	0	0	0	0	0	0	0
123012-12	Antarctica	Taylor Valley					-77.733	162.323		Modern	Water track			20.535	56.8	1.6596	98.3404	6.38441	90.778	2.83755		48.6486	5.4054	10.9109	6.1061	3.5035	0	0	12.012	5.6056	7.8078	0	0	0	0	0	0	0	0	0	0	0	0
122412-5	Antarctica	Taylor Valley					-77.5789	163.54		Modern	Water track			47.734	57	5.11335	94.8867	1.96757	73.9254	24.1071		27.2727	14.8851	10.7892	5.3946	3.3966	0	0	25.0749	3.5964	5.994	2.4975	0	0	0	0	0	1.0989	0	0	0	0	0
123012-5	Antarctica	Taylor Valley					-77.7428	162.347	520	Modern	Water track		Alpine-III, -IV (, Taylor-Ivb)	15.113	9.01	14.9201	85.0799	53.8476	46.1524	0																								5.23176	74.0605	0.86504	55.176	63.6566	57.056
122512-12	Antarctica	Taylor Valley					-77.5755	163.493	20	Modern	Water track		Ross Sea Drift	50.994	43	19.505	80.495	29.9296	69.9176	0.152802																								5.5927	77.1501	0.713374	49.4502	54.2027	49.3332
122412-7	Antarctica	Taylor Valley					-77.5791	163.539	424	Modern	Water track		Bonney Drift (, Taylor II)	44.449	31.1	14.7844	85.2156	20.7294	76.5381	2.73243																								6.22538	72.1747	0.82487	52.1779	58.0232	52.7274
122412-2	Antarctica	Taylor Valley					-77.5782	163.541	389	Modern	Water track		Ross Sea Conveyor Deposits (, Taylor III)	44.336	45	25.7195	74.2805	4.65582	95.2669	0.0773204																								4.53623	69.6044	0.998774	59.8141	65.7267	61.9672
010213-2	Antarctica	Taylor Valley					-77.7286	162.344	389	Modern	Water track		Ross Sea Conveyor Deposits (, Taylor III)	29.504	62.1	7.57096	92.429	11.6719	88.3281	0																								6.14076	74.1636	0.560133	47.7524	51.9738	47.3165
011213-13	Antarctica	Taylor Valley					-77.5819	163.493	389	Modern	Water track		Ross Sea Conveyor Deposits (, Taylor III)	20.703	51.8	15.4818	84.5182	1.11726	98.8039	0.0788363
122312-6	Antarctica	Taylor Valley					-77.7288	162.345	389	Modern	Water track		Ross Sea Conveyor Deposits (, Taylor III)	28.768	56.6	5.33998	94.66	11.519	88.481	0																								6.19035	76.1355	0.709263	49.7862	54.9757	49.7364
010213-1	Antarctica	Taylor Valley					-77.579	163.539	6	Modern	Water track		Ross Sea Drift	23.253	41.8	21.5055	78.4945	6.38409	93.6159	0		26.9618	3.1187	9.4567	10.9658	3.9235	0	0	14.3863	8.7525	22.4346	0	0	0	0	0	0	0	0	0	0	0	0	5.16973	70.1232	0.688486	52.9638	57.722	53.5489
122312-8	Antarctica	Taylor Valley					-77.5817	163.493		Modern	Water track			28.535	56.9	13.1797	86.8203	2.80826	97.1917	0		37.7918	7.8015	9.1187	2.0264	9.3213	0	0	13.7793	2.7356	7.9028	9.5239	0	0	0	0	0	0	0	0	0	0	0
122412-8	Antarctica	Taylor Valley					-77.579	163.539		Modern	Water track			34.241	47.1	19.9947	80.0053	7.79128	92.2087	0		45.2547	2.8971	10.6893	8.5914	2.6973	0	0	16.4835	0	13.3866	0	0	0	0	0	0	0	0	0	0	0	0
123012-11	Antarctica	Taylor Valley					-77.733	162.321	297	Modern	Water track		Bonney Drift (, Taylor II)	49.709	50.7	14.9431	85.0569	9.93159	90.0684	0		19.7395	1.1022	6.8136	4.008	3.2064	0	0	35.7715	3.6072	18.0361	3.2064	0	0	0	4.509	0	0	0	0	0	0	0	3.91421	67.7251	0.91929	60.0992	66.4349	62.4794
Whillans	Antarctica	Whillans Ice Sheet					-83.4783	-138.246	334	Modern	Subglacial drift	wet-based ice	Whillans subglacial drift	13.673								23.9	0	22	0	3.3	0	0	20.8	26	4	0	0	0	0	0	0	0	0	0	0	0	0	6.73097	58.3754	1.88439	65.2008	76.3697	71.4851
T10-GOLD-10Drift	Antarctica	Taylor Valley	77° 40.366'	S	162° 54.138'	E	-77.6518	162.933	447	LP_LGM	Drift	partly wet-based		11.025	13.5	15.6484	84.3516	1.48685	85.4462	13.0669		13.5952	3.3233	4.2296	0	0	0	0	7.5529	61.3293	5.8409	3.0211	0	0	0	1.1078	0	0	0	0	0	0	0
T10-GOLD-12Drift	Antarctica	Taylor Valley	77° 39.925'	S	162° 54.638'	E	-77.6518	162.933	371	LP_LGM	Drift	partly wet-based	Ross Sea conveyor deposits	30.118	2.8	73.1488	26.8512	5.75071	65.6638	28.5854		22.2	6.8	7.9	5.9	1.4	0	1.7	9.3	35.1	8.6	1.1	0	0	0	0	0	0	0	0	0	0	0	6.14576	72.9339	0.741434	50.531	55.9347	50.6582
T10-GOLD-9Drift	Antarctica	Taylor Valley	77° 40.676'	S	162° 53.703'	E	-77.6654	162.911	492	LP_LGM	Drift	partly wet-based	Possibly Taylor drift	27.847	30.2	10.6601	89.3399	2.03345	64.4387	33.5278		27.1975	3.1024	6.4116	5.3775	2.3785	0	1.3444	6.1013	25.0259	15.7187	7.3423	0	0	0	0	0	0	0	0	0	0	0	4.08884	67.8727	0.983885	60.7124	66.5268	62.9816
T10-GOLD-1	Antarctica	Taylor Valley	77° 41.192'	S	162° 52.328'	E	-77.6865	162.872	611	Modern	Proglacial fluvial		Boney Drift? (Taylor-Ivb)	32.432	67.1	8.52327	91.4767	5.68406	63.0504	31.2655		15.0849	2.8971	4.995	5.2947	2.3976	0	0	4.7952	28.0719	10.7892	18.7812	2.2977	0	0	4.5954	0	0	0	0	0	0	0	5.49759	69.2134	0.743359	54.2725	60.1367	55.3077
T10-Gold 2	Antarctica	Taylor Valley	77° 41.165'	S	162° 52.609'	E	-77.6861	162.877	608	Modern	Proglacial fluvial			39.808	43.67	33.6854	66.3146	6.40709	79.4087	14.1842
T10-Gold 4	Antarctica	Taylor Valley	77° 41.061'	S	162° 52.601'	E	-77.6842	162.873	577	Modern	Proglacial fluvial			38.346	75.4	2.85365	97.1463	2.35415	60.199	37.4469
T10-Gold 5	Antarctica	Taylor Valley	77° 41.053'	S	162° 52.384'	E	-77.6823	162.876	577	Modern	Proglacial fluvial			15.028	23.7	4.6727	95.3273	2.5168	63.807	33.6762																								5.95656	71.7552	0.691488	50.7139	55.6718	50.8686
T10-Gold 6	Antarctica	Taylor Valley	77° 40.939'	S	162° 52.591'	E	-77.6804	162.881	554	Modern	Proglacial fluvial			40.895	40.8	30.2747	69.7253	2.20983	81.383	16.4072
T10-GOLD-7	Antarctica	Taylor Valley	77° 40.822'	S	162° 52.886'	E	-77.6788	162.889	536	Modern	Proglacial fluvial			39.557	48.3	18.499	81.501	0.612139	83.2512	16.1367		16.4824	1.407	7.0352	5.2261	3.4171	0	0	7.6382	20.5025	8.4422	21.206	8.6432	0	0	0	0	0	0	0	0	0	0
T10-GOLD-9	Antarctica	Taylor Valley	77° 40.663'	S	162° 53.850'	E	-77.6738	162.674	491	Modern	Proglacial fluvial			33.532	54.7	6.64338	93.3566	0.51228	47.0262	52.4615		19.7	4.4	10.8	12.1	3.4	0	2.3	14.2	17.8	6.5	1.8	4.6	0	0	0	0	2.4	0	0	0	0	0
T10-Gold 10	Antarctica	Taylor Valley	77° 40.430'	S	162° 40.430'	E	-77.6693	162.905	452	Modern	Proglacial fluvial			24.685	38.6	12.5336	87.4664	0.585648	59.9045	39.5098
T10-Gold 11	Antarctica	Taylor Valley	77° 40.158'	S	162° 54.329'	E	-77.6653	162.913	400	Modern	Proglacial fluvial			23.854	54.2	9.10636	90.8936	1.08692	69.7265	29.1866
T10-Gold 12	Antarctica	Taylor Valley								Modern	Proglacial fluvial			33.649	50.22	30.9609	69.0391	1.24651	62.5932	36.1603																								5.81092	73.2032	0.816198	52.5339	58.5798	53.193
T10-Gold 13	Antarctica	Taylor Valley	77° 39.716'	S	162° 55.875'	E	-77.6592	162.931	343	Modern	Proglacial fluvial			23.871	56.7	5.15628	94.8437	1.10397	48.0171	50.879
T10-GOLD-14	Antarctica	Taylor Valley	77° 39.554'	S	162° 55.851'	E	-77.6561	162.92	352	Modern	Proglacial fluvial			24.838	55.9	1.17262	98.8274	5.71777	39.556	54.7262		21.4502	2.3162	7.1501	3.6254	2.719	0	0	3.9275	28.7009	8.9627	21.148	0	0	0	0	0	0	0	0	0	0	0	5.66345	73.9933	0.77809	50.3817	56.1622	50.4807
T10-Gold 15	Antarctica	Taylor Valley	77° 39.365'	S	162° 55.216'	E	-77.6235	163.109	339	Modern	Proglacial fluvial			66.258	3.73	37.6144	62.3856	6.4119	79.4813	14.1068
T10-HOW-8Drift	Antarctica	Taylor Valley	77° 39.017'	S	163° 06.617'	E	-77.657	163.097		LP_LGM	Drift	partly wet-based	Ross Sea Drift	32.4365	45.8	15.4328	84.5672	1.4638	75.9063	22.6299		22.6358	5.332	5.5332	4.9296	3.1187	0	0	12.7767	16.9014	13.2797	15.493	0	0	0	0	0	0	0	0	0	0	0	4.84204	69.1168	0.897784	57.0316	63.0199	58.6815
T10-HOW-9Drift	Antarctica	Taylor Valley	77° 39.190'	S	163° 05.899'	E	-77.6598	163.084	255	LP_LGM	Drift	partly wet-based	Ross Sea Drift	51.038	8.7	29.608	70.392	4.50333	59.6162	35.8805		26.2475	9.98	5.0898	3.493	4.3912	0	0	14.2715	22.4551	8.3832	5.6886	0	0	0	0	0	0	0	0	0	0	0	5.34488	69.9733	0.905938	57.1018	64.3335	59.1614
T10-HOW-10Drift	Antarctica	Taylor Valley					-77.6619	163.069	279	LP_LGM	Drift	partly wet-based	Ross Sea Drift	9.82	13.7	13.7792	86.2208	1.20878	72.9679	25.8233		24.2728	16.2487	8.4253	3.4102	3.6108	0	0	12.8385	21.665	7.4223	2.1063	0	0	0	0	0	0	0	0	0	0	0
T10-HOW-12Drift	Antarctica	Taylor Valley	77 ° 39.716'	S	163° 04.151'	E	-77.6729	162.895	297	LP_LGM	Drift	partly wet-based	Ross Sea Drift	32.119	60.1	18.8594	81.1406	5.33769	59.5951	35.0672		30.5694	7.8921	9.0909	5.1948	1.8981	0	1.2987	10.1898	10.1898	12.7872	10.8891	0	0	0	0	0	0	0	0	0	0	0	6.21963	73.5625	0.732725	50.154	55.638	50.1918
HOW-1	Antarctica	Taylor Valley	77° 37.408'	S	163° 06.556'	E	-77.6272	163.115	24	Modern	Proglacial fluvial			36.334	43.67	29.1875	70.8125	2.03	83.51	14.46
HOW-2	Antarctica	Taylor Valley	77° 37.631'	S	163° 06.902'	E	-77.6313	163.111	41	Modern	Proglacial fluvial			70.571	2.011	47.3149	52.6851	8.51	91.49	0
HOW-3	Antarctica	Taylor Valley	77° 37.878'	S	163° 06.660'	E	-77.6344	163.119	69	Modern	Proglacial fluvial			29.877	39.78	34.5968	65.4032	6.89	93.11	0
HOW-4	Antarctica	Taylor Valley	77° 38.062'	S	163° 07.155'	E	-77.6379	163.129	89	Modern	Proglacial fluvial			53.953	39.78	34.3971	65.6029	4.41	61.92	33.66
HOW-5	Antarctica	Taylor Valley	77° 38.275'	S	163° 07.719'	E	-77.6423	163.126	127	Modern	Proglacial fluvial			34.524	43.67	43.1435	56.8565	6.38	80.92	12.7
HOW-6	Antarctica	Taylor Valley	77° 38.537'	S	163° 07.562'	E	-77.6467	163.123	158	Modern	Proglacial fluvial			50.486	6.1818	44.0758	55.9242	13.93	86.07	0
T10-HOW-7	Antarctica	Taylor Valley	77° 38.803'	S	163° 07.367'	E	-77.6503	163.11	190	Modern	Proglacial fluvial			34.264	5.84	34.4682	65.5318	1.35494	59.9348	38.7103		20.9	6.6	4	6.8	2.2	0	0	14.9	25.3	11.6	3.2	0	0	0	4.5	0	0	0	0	0	0	0
T10-HOW-8	Antarctica	Taylor Valley	77° 39.017'	S	163° 06.617'	E	-77.657	163.097		Modern	Proglacial fluvial			41.8248	2.315	32.9816	67.0184	0.864184	76.3329	22.8029
T10-HOW-9	Antarctica	Taylor Valley	77° 39.190'	S	163° 05.899'	E	-77.6598	163.084	255	Modern	Proglacial fluvial			32.322	5.37	32.7264	67.2736	5.8152	90.9099	3.27492		20.979	5.6943	3.996	1.7982	3.0969	0	0	11.2887	32.1678	13.1868	3.3966	1.4985	0	0	2.8971	0	0	0	0	0	0	0
HOW-10	Antarctica	Taylor Valley	77° 39.419'	S	163° 05.800'	E	-77.6619	163.069	279	Modern	Proglacial fluvial			64.841	6.459	45.4659	54.5341	12.67	62.86	24.47
HOW-11	Antarctica	Taylor Valley	77° 39.590'	S	163° 05.060'	E	-77.6622	163.075	286	Modern	Proglacial fluvial			20.319	43.67	26.6332	73.3668	11.04	88.96	0
HOW-12	Antarctica	Taylor Valley	77 ° 39.716'	S	163° 04.151'	E	-77.6729	162.895	297	Modern	Proglacial fluvial			64.646	26.17	34.8915	65.1085	4.75	74.08	21.17
HOW-13	Antarctica	Taylor Valley	77° 39.733'	S	163° 04.474'	E	-77.6728	162.902	287	Modern	Proglacial fluvial			22.851	43.67	28.7622	71.2378	25.66	74.34	0
D7	Antarctica	Taylor Valley								Modern	Proglacial fluvial		Stream delta	67.395	4.49	37.5108	62.4892	49.4019	10.0871	40.511		26.973	14.4855	6.993	3.7962	1.4985	0	0	12.3876	9.4905	4.8951	18.4815	0	0	0	0.999	0	0	0	0	0	0	0	5.9934	74.5804	0.943554	51.2347	58.0433	51.6131
T10-CAMP-SP-0cm	Antarctica	Taylor Valley	77° 39.109'	S	162° 55.987'	E	-77.6518	162.933	374	LP_LGM	Soil		Ross Sea conveyor soil	57.089	41.9	22.6354	77.3646	3.66173	72.4408	23.8975		24.6	4.4	5.2	4.4	2	0	1.2	20.3	14.4	8.4	15.1	0	0	0	0	0	0	0	0	0	0	0	5.78424	70.1197	0.776979	53.1246	59.4966	53.9764
T10-CAMP-SP-10cm	Antarctica	Taylor Valley	77° 39.109'	S	162° 55.987'	E	-77.6518	162.933	374	LP_LGM	Soil		Ross Sea conveyor soil	67.215	61.5	5.27821	94.7218	2.26325	72.0025	25.7342		19.7	6.8	4.5	5	4.3	0	2.2	20.9	4.1	11.4	17.8	0	0	0	3.3	0	0	0	0	0	0	0	4.46283	68.4392	0.873475	56.0341	61.0663	57.2248
T10-CAMP-SP-20cm	Antarctica	Taylor Valley	77° 39.109'	S	162° 55.987'	E	-77.6518	162.933	374	LP_LGM	Soil		Ross Sea conveyor soil	66.028	46.3	10.4307	89.5693	7.09	72.1127	20.7973		27.2177	8.6694	7.4597	7.7621	1.7137	0	2.1169	6.25	24.5968	6.25	7.9637	0	0	0	0	0	0	0	0	0	0	0	5.91519	72.7669	0.721907	49.2708	54.6999	49.0902
T10-CAMP-SP-30cm	Antarctica	Taylor Valley	77° 39.109'	S	162° 55.987'	E	-77.6518	162.933	374	LP_LGM	Soil		Ross Sea conveyor soil	64.232	60.3	2.47441	97.5256	5.5909	68.5526	25.8565		33.4	7.5	7.4	5.8	2.2	0	1.7	16.6	15.8	6	3.6	0	0	0	0	0	0	0	0	0	0	0	5.86686	71.7057	0.773466	50.5797	56.3059	50.7277
BHS-90-115	Antarctica	Wright Valley								EQ_Pliocene	Drift	cold-based ice	Onyx drift	28.288	57.4	10.2627	89.7373	1.57551	83.8249	14.5996		20.4204	9.6096	5.8058	4.7047	3.003	0	1.7017	17.4174	24.1241	13.2132	0	0	0	0	0	0	0	0	0	0	0	0	3.60158	69.289	1.24335	63.1289	69.2285	65.9373
BHS-93-36	Antarctica	Wright Valley								E-M Q	Drift	cold-based ice	Trilogy drift	19.154	59.3	9.81075	90.1893	2.45246	70.1312	27.4164		17.6	2.6	5.2	4.1	3.9	0	0	14.5	38.6	10	3.5	0	0	0	0	0	0	0	0	0	0	0	5.14182	68.9545	0.788911	53.7907	58.3351	54.4903
BHS-93-34	Antarctica	Wright Valley								E-M Q	Drift	cold-based ice	Trilogy drift	10.645	54	12.7793	87.2207	0.715323	63.5249	35.7598		33	6.8	10.7	5.6	4.5	0	2.7	4.8	20.4	11.5	0	0	0	0	0	0	0	0	0	0	0	0	5.90694	73.5329	0.794872	49.7667	54.8646	49.7134
BHS-93-20	Antarctica	Wright Valley								Modern	Proglacial fluvial		W. Valley stream front delta	19.329	52.1	13.8789	86.1211	29.0595	65.7598	5.18076		22.022	6.6066	8.5085	4.1041	3.7037	0	2.2022	0	31.5315	15.1151	3.4034	0	0	0	2.8028	0	0	0	0	0	0	0	5.84087	73.0583	0.732992	50.0156	54.8086	50.0189
BHS-90-027z	Antarctica	Wright Valley								Miocene	Drift	wet-based ice	Peleus till	27.833	27.5	33.0924	66.9076	39.5342	36.3575	24.1083		41.9162	11.7764	19.0619	11.3772	2.495	0	0	0	0	3.493	1.1976	0	0	0	8.6826	0	0	0	0	0	0	0	6.81024	74.5148	0.668354	47.5097	51.6274	47.037
BHS-93-19	Antarctica	Wright Valley									Proglacial fluvial			9.2165	64.6	16.9086	83.0414	0.20654	74.5699	25.2236		41.776	8.1736	12.6135	9.2836	3.8345	0	1.8163	5.6509	10.3935	6.4581	0	0	0	0	0	0	0	0	0	0	0	0	4.11885	67.4391	0.967542	58.8987	63.7573	60.4988
BHS-93-23	Antarctica	Wright Valley								E-M Q	Drift	cold-based ice	Trilogy drift	14.2	48	19.2399	80.7601	1.04242	62.5183	36.4393		20.2417	7.3515	6.3444	5.3374	5.7402	0	0	8.4592	17.9255	13.2931	15.3072	0	0	0	0	0	0	0	0	0	0	0
BHS-93-29	Antarctica	Wright Valley								LQ	Drift	cold-based ice	Brownworth drift	6.749	29.8	9.76657	90.2334	0.136918	10.4101	89.4529		45.3815	19.7791	14.3574	4.6185	2.8112	0	0	0	3.2129	9.8394	0	0	0	0	0	0	0	0	0	0	0	0	5.05342	71.9237	0.868415	52.7391	57.2359	53.2497
BHS-93-28	Antarctica	Wright Valley									Drift	cold-based ice		10.1	61.4	3.7035	96.2965	2.14544	50.68	47.1746		26.5121	6.3508	6.6532	6.1492	3.4274	0	0	0	41.4315	6.754	0	0	0	0	2.7218	0	0	0	0	0	0	0
10-OR-14	Antarctica	Wright Valley	77° 27.003'	S	162° 29.858'	E	-77.4501	162.498	264	Modern	Proglacial fluvial			14.58	51	13.4497	86.5503	0.791766	97.1924	2.01585		25.1256	6.5327	7.8392	9.1457	5.3266	0	0	0	20.3015	12.5628	10.9548	2.2111	0	0	0	0	0	0	0	0	0	0
10-OR-16	Antarctica	Wright Valley	77° 27.318'	S	162° 28.581'	E	-77.4553	162.476	255	Modern	Proglacial fluvial			9.277	60.3	5.57405	94.4259	0.995878	95.2291	3.77499		37.7	8.4	11.8	14.2	7	0	0	1	5.3	4.2	1.5	8.9	0	0	0	0	0	0	0	0	0	0
10-OR-19	Antarctica	Wright Valley	77° 27.787'	S	162° 26.567'	E	-77.4631	162.443	252	Modern	Proglacial fluvial			9.086	56.3	4.85732	95.1427	7.76562	87.2999	4.93451		23.1156	7.6382	7.9397	4.0201	12.8643	0	0	5.9296	33.2663	5.2261	0	0	0	0	0	0	0	0	0	0	0	0
UOR-SP-10cm	Antarctica	Wright Valley	77° 39.109'	S	162° 55.987'	E	-77.4332	162.405	336	LQ	Soil			11.833	40.5	28.0201	71.9799	0.152469	98.8496	0.997969		23.2558	6.5723	7.3812	7.3812	0	0	2.73	9.7068	31.4459	1.7189	6.8756	2.9264	0	0	0	0	0	0	0	0	0	0
UOR-SP-20cm	Antarctica	Wright Valley	77° 39.109'	S	162° 55.987'	E	-77.4332	162.405		LQ	Soil			23.342	45	26.4358	73.5642	1.24898	85.5894	13.1616		19.697	3.8384	6.3636	7.0707	2.0202	0	0	12.7273	37.1717	9.1919	1.9192	0	0	0	0	0	0	0	0	0	0	0
UOR-SP-30cm	Antarctica	Wright Valley	77° 39.109'	S	162° 55.987'	E	-77.4332	162.405		LQ	Soil			26.266	58.8	25.4185	74.5815	3.1759	71.492	25.332		23.2394	4.0241	7.0423	6.1368	2.4145	0	2.4145	17.3038	24.2455	11.0664	2.1127	0	0	0	0	0	0	0	0	0	0	0
UOR-SP-Merged	Antarctica	Wright Valley	77° 39.109'	S	162° 55.987'	E	-77.4332	162.405	336	LQ	Soil		lake conveyor belt deposit soil	20.4803	48.1	26.6248	73.3752	1.52578	83.8635	14.6107		22.0641	4.8116	6.929	6.8629	1.4782	0	1.7148	13.246	30.9544	7.3257	3.6358	0.9755	0	0	0	0	0	0	0	0	0	0	4.51267	69.7895	0.99026	57.806	63.5443	59.5266
10-CG-1	Antarctica	Wright Valley	77° 25.058'	S	162° 32.191'	E	-77.4176	162.537	460-470	Modern	Proglacial fluvial			15.064	50.22	19.3558	80.6442	2.39956	92.0672	5.53324		36.1638	7.6923	11.1888	6.5934	3.2967	0	1.7982	2.997	19.5804	3.3966	6.2937	0	0	0	0.999	0	0	0	0	0	0	0	5.96916	74.6304	0.680897	47.4884	51.062	47.0797
W10-CG-2	Antarctica	Wright Valley	77° 25.078'	S	162° 33.189'	E	-77.418	162.553	455	Modern	Proglacial fluvial			29.025																														5.79955	73.7111	0.839576	51.1633	56.1077	51.4122
W10-CG-3	Antarctica	Wright Valley	77° 25.064'	S	162 34.143'	E	-77.4177	162.569	450	Modern	Proglacial fluvial			24.035	60.52	26.108	73.892	0.637121	92.5037	6.85915																								6.03302	72.532	0.716172	49.1115	53.289	48.9463
W10-CG-4	Antarctica	Wright Valley	77° 25.130'	S	162° 35.510'	E	-77.4189	162.592	443	Modern	Proglacial fluvial			12.629	66.44	19.2778	80.7222	0.253327	98.9224	0.824319																								7.04506	69.8995	0.453272	42.9356	45.5073	42.0355
W10-CG-5	Antarctica	Wright Valley	77° 25.159'	S	162° 36.615'	E	-77.4193	162.61	430	Modern	Proglacial fluvial			10.811	60.52	22.5532	77.4468	0.248898	94.7791	4.97196																								6.22347	72.9737	0.605704	46.4617	49.7707	45.9191
10-CG-6	Antarctica	Wright Valley	77° 25.267'	S	162° 37.666'	E	-77.4211	162.628	402	Modern	Proglacial fluvial			9.927	60.52	15.3419	84.6581	0.36	98.17	1.47		28.7712	11.988	14.2857	27.6723	5.8941	0	0	3.3966	0	3.996	0	1.1988	0	0	0	0	1.1988	0	0	0	0	0	6.25691	72.4873	0.602127	46.2529	49.4874	45.6894
W10-CG-7	Antarctica	Wright Valley	77° 25.633'	S	162° 39.353'	E	-77.4272	162.656	317	Modern	Proglacial fluvial			8.275	60.52	19.9273	80.0727	0.168848	99.7925	0.0386942																								6.81346	70.9265	0.500125	43.934	46.6694	43.1285
W10-CG-8	Antarctica	Wright Valley	77° 25.882'	S	162° 39.613'	E	-77.4314	162.66	297	Modern	Proglacial fluvial			5.879	66.44	13.8741	86.1259	0.278351	99.2474	0.474227																								6.65091	72.2586	0.527479	44.1744	46.9606	43.39
W10-CG-9	Antarctica	Wright Valley	77° 26.140'	S	162° 39.679'	E	-77.4357	162.661	289	Modern	Proglacial fluvial			6.86	66.44	12.5409	87.4591	0.14141	98.5088	1.34982																								6.72454	70.7302	0.519137	44.3192	47.175	43.5366
W10-CG-10	Antarctica	Wright Valley	77° 26.367'	S	162° 38.959'	E	-77.4394	162.649	284	Modern	Proglacial fluvial			2.481	63.41	13.1761	86.8239	0.0521327	99.0142	0.933649																								7.0099	70.9388	0.448161	42.2119	44.4878	41.3243
10-CG-12	Antarctica	Wright Valley	77° 26.663'	S	162° 37.964'	E	-77.4444	162.633	275	Modern	Proglacial fluvial			8.351	60.52	18.1543	81.8457	0.1	99.25	0.65		33.9698	18.593	14.3719	21.7085	6.1307	0	0	1.7085	0	3.5176	0	0	0	0	0	0	0	0	0	0	0	0	6.33078	72.4934	0.608192	46.1828	49.347	45.6212
10-DG-1	Antarctica	Wright Valley	77° 27.712'	S	162° 36.753'	E	-77.4619	162.613	539	Modern	Proglacial fluvial			11.072	8.42	25.9551	74.0449	49.3289	46.1192	4.55194		20.1798	2.8971	8.5914	3.0969	4.0959	0	0	6.4935	38.7612	7.5924	6.7932	0	0	0	1.4985	0	0	0	0	0	0	0	5.79418	72.0774	0.795739	51.5264	57.0284	51.8914
W10-DG-2	Antarctica	Wright Valley	77° 27.763'	S	162° 36.959'	E	-77.4627	162.616	544	Modern	Proglacial fluvial			16.245
W10-DG-3	Antarctica	Wright Valley	77° 27.683'	S	162° 37.141'	E	-77.4614	162.619	520	Modern	Proglacial fluvial			18.9607
W10-DG-4	Antarctica	Wright Valley	77° 27.528'	S	162° 37.173'	E	-77.4588	162.62	447	Modern	Proglacial fluvial			24.51
W10-DG-5	Antarctica	Wright Valley	77° 27.409'	S	162° 36.929'	E	-77.4568	162.615	420	Modern	Proglacial fluvial			15.686
W10-DG-6	Antarctica	Wright Valley	77° 27.281'	S	162° 37.000'	E	-77.4547	162.617	379	Modern	Proglacial fluvial			17.932
W10-DG-7	Antarctica	Wright Valley	77° 27.145'	S	162° 36.955'	E	-77.4524	162.616	328	Modern	Proglacial fluvial			14.574
W10-DG-8	Antarctica	Wright Valley	77° 27.000'	S	162° 36.782'	E	-77.45	162.613	286	Modern	Proglacial fluvial			10.123
10-DG-9	Antarctica	Wright Valley	77° 26.911'	S	162° 36.389'	E	-77.4485	162.607	284	Modern	Proglacial fluvial			6.276	49.9	9.11559	90.8844	12.4291	52.2283	35.3426		22.2222	15.1151	7.2072	4.8048	7.4074	0	2.5025	10.9109	24.6246	3.7037	1.5015	0	0	0	0	0	0	0	0	0	0	0	6.36015	75.6851	0.774843	48.1	52.9971	47.6693
10-DG-10	Antarctica	Wright Valley	77° 26.866'	S	162° 35.886'	E	-77.4478	162.598	285	Modern	Proglacial fluvial			11.9685	3.94	52.2722	47.7278	13.0187	62.5225	24.4588		17.5	13.9	5.1	2.2	7.1	0	0	4.9	41.7	5.3	2.3	0	0	0	0	0	0	0	0	0	0	0	6.21435	76.389	0.827066	49.0588	54.4348	48.8272
W10-DG-11	Antarctica	Wright Valley	77° 26.738'	S	162° 35.957'	E	-77.4456	162.599	272	Modern	Proglacial fluvial			14.416
W10-DWG-1	Antarctica	Wright Valley	77° 28.255'	S	162° 32.575'	E	-77.4709	162.543	600	Modern	Proglacial fluvial			12.341	67.5	5.50743	94.4926	2.5168	63.807	33.6762		16.7832	3.8961	5.7942	2.3976	4.6953	0	1.6983	15.4845	31.4685	6.3936	11.3886	0	0	0	0	0	0	0	0	0	0	0
W10-DWG-3	Antarctica	Wright Valley	77° 28. 156'	S	162° 31.593'	E	-77.4693	162.527	480	Modern	Proglacial fluvial			19.586	52.6	5.65495	94.345	1.07775	47.9898	50.9324
W10-DWG-4	Antarctica	Wright Valley	77° 28.117	S	162° 31.070'	E	-77.4686	162.518	425	Modern	Proglacial fluvial			14.589	5.17	46.7431	53.2569	1.11412	42.4038	56.4821
W10-DWG-5	Antarctica	Wright Valley	77° 28.088'	S	162° 30.526'	E	-77.4681	162.509	393	Modern	Proglacial fluvial			16.85	8.42	21.1226	78.8774	1.77873	42.4358	55.7854
W10-DWG-7	Antarctica	Wright Valley	77° 27.983'	S	162° 29.584'	E	-77.4664	162.493	309	Modern	Proglacial fluvial			14.983	21.5	18.7075	81.2925	1.61972	36.0161	62.3642
W10-DWG-8	Antarctica	Wright Valley	77° 27.895'	S	162° 29.154'	E	-77.4649	162.486	266	Modern	Proglacial fluvial			12.079	17.3	20.7531	79.2469	0.974547	71.7859	27.2395
T10-MAG-2	Antarctica	Taylor Valley	77° 41.736'	S	162° 44.691'	E	-77.6956	162.745	704	Modern	Proglacial fluvial			45.7882	3.99	55.5752	44.4248	7.70539	64.4633	27.8313		15.1057	21.3494	5.6395	2.4169	0	0	0	19.9396	20.5438	12.5881	2.4169	0	0	0	0	0	0	0	0	0	0	0	4.83986	73.9306	1.52041	60.9748	69.8625	64.7201
10-LWG-1	Antarctica	Wright Valley	77° 24.695'	S	162° 48.496'	E	-77.4116	162.808		Modern	Proglacial fluvial			9.627	59.9	13.9765	86.0235	0.0582008	92.4215	7.52034
W10-CG-SP1-10cm	Antarctica	Wright Valley	77° 25.071'	S	162° 33.358'	E	-77.4179	162.556	453		Soil			33.099	4.04	37.5254	62.4746	1.01919	84.748	14.2329		30.7615	12.024	11.3226	13.4269	3.6072	0	0	25.1503	0	3.7074	0	0	0	0	0	0	0	0	0	0	0	0
W10-CG-SP1-20cm	Antarctica	Wright Valley	77° 25.071'	S	162° 33.358'	E	-77.4179	162.556	453		Soil			11.048	25.1	18.4362	81.5638	0.171691	32.6181	67.2102		42.1421	6.4064	13.8138	10.4104	2.9029	0	0	15.1151	2.6026	5.005	0	0	0	0	1.6016	0	0	0	0	0	0	0
W10-CG-SP1-30cm	Antarctica	Wright Valley	77° 25.071'	S	162° 33.358'	E	-77.4179	162.556	453		Soil			25.727								23.8238	5.3053	7.6076	12.4124	4.004	0	0	3.7037	19.8198	12.5125	10.8108	0	0	0	0	0	0	0	0	0	0	0
LP-16-1	Peru	Lake Paron		S		W	-8.98889	-77.6697	4177	Modern	Proglacial lake			6.972	3.6	55.891	44.109	92.5337	6.81968	0.646615		46.9	16.7	16.1	0	0	0	0	10.9	0	3.9	0	0	3.6	1.9	0	0	0	0	0	0	0	0	6.23234	87.5525	2.00732	55.2101	64.7149	57.3771
LP-16-2	Peru	Lake Paron	08° 59.946'	S	77° 41.045'	W	-8.9991	-77.6841	4179	Modern	Proglacial lake			3.994	4.95	38.2841	61.7159	97.1078	2.8922	0		44.3	18.5	22.5	0	0	0	0	12.3	0	2.4	0	0	0	0	0	0	0	0	0	0	0	0	6.34655	87.2339	1.96711	54.7552	64.1435	56.7234
RL-16-1	Peru	Rio Llanganuco	09° 03.077'	S	77° 37.022'	W	-9.05128	-77.617	3855	Modern	Proglacial fluvial			2.765	38.4	6.59557	93.4044	34.9833	60.7775	4.23923		47.7778	12.0202	25.9596	0	0	0	0	10.9091	0	3.3333	0	0	0	0	0	0	0	0	0	0	0	0	7.08502	74.9838	1.52561	53.7457	61.0489	54.9237
RL-16-2	Peru	Rio Llanganuco	09° 4.089'	S	77° 38.372'	W	-9.06815	-77.6395	3852	Modern	Proglacial fluvial			11.473	16.6	18.8506	81.1494	39.7676	41.0983	19.1341		38.2	11.6	20.5	0	1.7	0	0	16.4	0	9	0	0	0	0	2.6	0	0	0	0	0	0	0	7.05245	66.1288	1.55581	58.7976	68.3142	62.1954
RL-16-3	Peru	Rio Llanganuco	09° 4.856'	S	77° 39.203'	W	-9.08093	-77.6534	3781	Modern	Proglacial fluvial			4.151	57	9.70003	90.3	2.12916	69.657	28.2138		43.3566	13.986	26.6733	4.8951	0	0	0	11.0889	0	0	0	0	0	0	0	0	0	0	0	0	0	0	5.24564	78.5116	2.29022	60.6889	68.9117	64.0393
RL-16-4	Peru	Rio Llanganuco	09° 5.219'	S	77° 39.560'	W	-9.08698	-77.6593	3657	Modern	Proglacial fluvial			8.36	5.8	29.1885	70.8115	2.75213	53.758	43.4899		49.6	6.5	31.1	0	0	0	0	8.1	0	4.7	0	0	0	0	0	0	0	0	0	0	0	0	7.34715	70.9639	1.94101	58.1017	67.8461	61.3668
RL-16-5	Peru	Rio Llanganuco	09° 5.584'	S	77° 40.082'	W	-9.09307	-77.668	3562	Modern	Proglacial fluvial			2.752	61.7	5.80697	94.193	10.1315	76.4557	13.4128		39.9	12.9	37.4	0	0	0	0	6.1	0	3.7	0	0	0	0	0	0	0	0	0	0	0	0	8.59949	67.8031	1.86827	55.2999	63.9738	57.2718
RL-16-6	Peru	Rio Llanganuco	09° 5.964'	S	77° 40.476'	W	-9.0994	-77.6746	3469	Modern	Proglacial fluvial			4.476	48.4	16.4427	83.5573	9.32769	68.5538	22.1185		28.9	24.1	34.1	0	0	0	0	10.6	0	2.3	0	0	0	0	0	0	0	0	0	0	0	0	8.96512	60.5559	1.86749	58.1456	68.1664	61.5378
RL-16-7	Peru	Rio Llanganuco	09° 8.699'	S	77° 42.243'	W	-9.14498	-77.704	2775	Modern	Proglacial fluvial			3.649	45.8	3.60186	96.3981	40.5318	48.3935	11.0747		30.8	14.8	32.6	0	1.1	0	0	14.7	0	6	0	0	0	0	0	0	0	0	0	0	0	0	7.328	68.6728	1.76491	56.0362	63.91	58.0099
RL-16-8	Peru	Rio Llanganuco	09° 9.253'	S	77° 42.90'	W	-9.15422	-77.715	2635	Modern	Proglacial fluvial			1.92	49.5	2.99296	97.007	40.9948	58.2964	0.70879		43.5435	10.01	27.9279	0	1.1011	0	0	9.5095	0	7.9079	0	0	0	0	0	0	0	0	0	0	0	0	7.58629	69.4328	1.66465	54.8144	62.2213	56.3188
RL-16-Distal	Peru	Rio Llanganuco	09° 10.143'	S	77° 43.544'	W	-9.16905	-77.7257	2499	Modern	Proglacial fluvial			3.884	50.7	3.16861	96.8314	32.7797	52.4427	14.7775		34.4444	19.2929	31.8182	0	0	0	0	11.3131	0	3.1313	0	0	0	0	0	0	0	0	0	0	0	0	7.73915	67.6233	1.68005	55.027	62.1907	56.5318
Llaka Lake Debris	Peru	Lake Paron		S		W	-9.43444	-77.4436	4473	Modern	Drift	wet-based ice	Potential till	6.216	41	27.4958	72.5042	18.0399	36.3982	45.5619		30.0706	27.8721	24.975	0	0	0	0	14.2857	0	2.7972	0	0	0	0	0	0	0	0	0	0	0	0	6.47952	88.8863	1.75724	52.639	61.1921	53.6629
RP-16-1D	Peru	Rio Paron	09° 00.214'	S	77° 41.246'	W	-9.00357	-77.6874	4100	Modern	Proglacial fluvial			6.065	6.57491	28.4455	84.998	69.11	30.76	0.13																								6.68734	83.3684	2.06926	55.465	65.1783	57.7855
RP-16-2	Peru	Rio Paron	09° 00.493'	S	77° 41.663'	W	-9.00822	-77.6944		Modern	Proglacial fluvial			6.68	8.494	26.8218	73.1782	56.85	43.1	0.05
RP-16-3	Peru	Rio Paron	09° 00.756'	S	77° 41.998'	W	-9.0126	-77.7	3958	Modern	Proglacial fluvial			0.729	53.3285	2.35245	97.6476	27.51	72.19	0.3																								8.8186	74.4524	1.7116	51.5602	58.831	52.0724
RP-16-4D	Peru	Rio Paron	09° 00.214'	S	77° 41.246'	W	-9.01805	-77.7069		Modern	Proglacial fluvial			1.469	42.897	3.53266	96.4673	15.01	82.9	2.09
RP-16-5	Peru	Rio Paron	09° 1.438'	S	77° 42.952'	W	-9.02397	-77.7159	3735	Modern	Proglacial fluvial			9.524	7.91443	26.5126	73.4874	29.53	63.3	7.17																								7.52207	78.1318	1.92822	54.2905	63.1547	55.9649
RP-16-6	Peru	Rio Paron	09° 2.353'	S	77° 43.964'	W	-9.03917	-77.7328	3290	Modern	Proglacial fluvial			3.135	37.1295	11.2044	88.7956	3.53	37.39	59.08																								7.54963	73.6959	1.9891	55.7989	64.3603	57.9009
RP-16-7	Peru	Rio Paron	09° 01.721'	S	77° 43.419'	W	-9.02868	-77.7237		Modern	Proglacial fluvial			7.429	9.39337	22.2862	77.7138	7.65	47.23	45.13
RP-16-8	Peru	Rio Paron	09° 03.023'	S	77° 44.794'	W	-9.05038	-77.7466	3016	Modern	Proglacial fluvial			1.476				3.61	69.49	26.9																								8.90665	72.1494	1.70489	51.885	58.8155	52.4662
Zona de Pitek 20 cm	Peru	Unchus					9.49174	77.4726	3704	Modern	Soil			5.219	50.5	7.77985	92.2202	64.2268	35.4397	0.333448		40.5594	4.7952	32.3676	0	0	0	0	13.5864	1.3986	7.2927	0	0	0	0	0	0	0	0	0	0	0	0	7.02341	56.2761	2.81965	65.5883	74.4913	70.4849
Zona de Pitek 60 cm	Peru	Unchus					9.49174	77.4726	3704	Modern	Soil			4.809	51.2	8.49794	91.5021	70.9154	28.9635	0.12105		41.2587	17.3826	27.972	0	0.5994	0	0	9.99	0	2.7972	0	0	0	0	0	0	0	0	0	0	0	0	7.04088	59.6899	2.62193	63.2599	71.8415	67.4221
LSTR-16-1
LUL-16-1
LLL-16-1
MS Glacial Drift	Washington	Mount Stuart	47.4868	N	120.9	W	47.4868	-120.9	411	Modern	Drift	wet-based ice	Mount Stuart glacial drift	4.978	30.9	10.9261	89.0739	10.9218	62.4622	26.616		40.6488	2.1341	9.8573	0	17.9871	4.3697	0	9.5525	0	5.7925	0	0	0	0	9.6541	0	0	0	0	0	0	0	7.06063	72.644	0.552931	47.4737	50.5974	47.1178
MS B1 SED Horshoe	Washington	Mount Stuart	47.489	N	120.901	W	47.489	-120.901	1660	Modern	Drift	wet-based ice	Horshoe lake drainage sediment / glacial drift	6.436	9.29	21.742	78.258	6.20267	83.1087	10.6886		42.5723	1.8943	6.7797	0	13.8584	0	0	7.7767	0	7.8764	5.5833	0	1.1964	0	12.4626	0	0	0	0	0	0	0	6.85	66.8389	0.653361	51.6903	55.2631	51.9413
MSA-1	Washington	Mount Stuart	47.5021	N	120.85	W	47.5021	-120.85	1400	Modern	Proglacial fluvial			6.514	62.1	2.81006	97.1899	4.38637	95.6136	0		22.9459	0	5.4108	0	12.2244	0	0	11.523	0	9.519	11.8236	15.8317	0	0	10.7214	0	0	0	0	0	0	0	7.32082	67.469	0.461097	49.3543	51.8564	49.2854
MSA-2	Washington	Mount Stuart	47.5336	N	120.846	W	47.5046	-120.843	1390	Modern	Proglacial fluvial			4.566	56.4	3.3685	96.6315	4.7591	95.0821	0.158776		27.9841	2.9087	9.328	0	23.0693	0	0	5.9178	0	10.5316	8.7262	2.9087	0	0	4.6139	0	0	0	0	0	0	0	6.84976	67.6122	0.565582	51.3778	54.2499	51.5409
MSA-3	Washington	Mount Stuart	47.5092	N	120.83	W	47.5092	-120.83	1220	Modern	Proglacial fluvial			9.644	57.9	5.92115	94.0789	2.20216	97.5823	0.215581		24.4244	6.4064	7.3073	0	20.1201	0	0	2.1021	0	15.7157	8.008	1.8018	0	0	8.1081	0	6.006	0	0	0	0	0	6.72454	64.7832	0.526525	50.6677	53.1862	50.7375
MSA-5	Washington	Mount Stuart	47.5041	N	120.84	W	47.5336	-120.816	1070	Modern	Proglacial fluvial			6.897	47.5	5.14519	94.8548	3.84657	75.2178	20.9356		29.5704	0	8.3916	0	13.6863	0	0	9.1908	0	13.2867	11.3886	4.7952	0	0	3.7962	0	5.8941	0	0	0	0	0	6.5074	64.4248	0.581401	53.6443	56.6632	54.079
MSB-4 SED	Washington	Mount Stuart	47.4979	N	120.861	W	47.4979	-120.861		Modern	Proglacial fluvial			5.575	37.8	8.93452	91.0655	1.34091	86.8698	11.7893		38.5	4.1	11.4	0	23.2	0	0	0.5	0	17.2	2.1	0	0	0	3	0	0	0	0	0	0	0
MSB-5 Sed-1	Washington	Mount Stuart	47.5358	N	120.815	W	47.5041	-120.84		Modern	Proglacial fluvial			5.444	47.3	4.95656	95.0434	8.4847	87.7607	3.75458		34.6	1	9.6	0	18.2	0	0	0	0	14.4	6.3	6.9	0	0	1.8	0	7.2	0	0	0	0	0	6.55923	65.0494	0.567428	53.0844	55.7874	53.4153
MSB-5 Sed-2	Washington	Mount Stuart	47.5176	N	120.826	W	47.5041	-120.84		Modern	Proglacial fluvial			7.209	57	4.15777	95.8422	4.78881	93.4309	1.78029		21.8	2.6	5.6	1.2	9.7	0	0	8.1	0	8.6	18.4	16	0	0	8	0	0	0	0	0	0	0	6.81201	66.5059	0.538999	51.6119	54.3946	51.7957
MSB-5 Soil	Washington	Mount Stuart	47.5046	N	120.843	W	47.5041	-120.84	1380	Recent	Soil		Mount Stuart soil	3.191	40.1	7.37424	92.6258	19.6228	79.9661	0.411042		38.3	5.9	7.9	0	8.7	0	0	4.5	0	13.7	8.2	9.1	0	0	3.7	0	0	0	0	0	0	0	7.10137	67.624	0.547473	48.8765	50.9115	48.7789
MSc A1	Washington	Mount Stuart	47.502	N	120.842	W	47.502	-120.842	1410	Modern	Proglacial fluvial			2.016	47.6	3.5216	96.4784	18.0207	79.7659	2.21339		24.024	10.2102	6.7067	0	4.3043	0	0	8.008	0	5.5055	13.8138	0	0	0	27.4274	0	0	0	0	0	0	0	6.76125	63.7316	0.825998	55.2807	59.3177	56.1127
AUS Drift PROX	Norway	Austerdalsbreen	61° 35.040'	N	7° 0.060'	E	61.584	7.001	407	Little Ice Age	Drift	wet-based ice	Austerdalsbreen Till	1.045	34.2	6.48136	93.5186	1.90252	29.7145	68.383		21.7426	7.9996	10.0508	0	0	0	0	0	58.7665	1.433	0	0	0	0	0	0	0	0	0	0	0	0	7.41348	76.5614	1.66437	53.6523	62.9223	55.178
AUS Drift Distal	Norway	Austerdalsbreen	61° 33.780'	N	6° 59.520'	E	61.563	6.992	318	Little Ice Age	Drift	wet-based ice	Austerdalsbreen Till	2.9	56.1	2.06267	97.9373	6.87001	49.1611	43.9689		34.2424	9.2929	15.9596	0	0	0	0	2.7273	37.7778	0	0	0	0	0	0	0	0	0	0	0	0	0	7.7452	75.9099	1.82808	53.2744	63.1011	54.7556
AUS-1	Norway	Austerdalsbreen					61.589	6.994		Modern	Proglacial fluvial			1.211	70.7	0.61	99.39	1.90327	65.8419	32.2548
AUS-SED-2	Norway	Austerdalsbreen	61° 34.980'	N	7° 0.180'	E	61.583	7.003	385	Modern	Proglacial fluvial			1.0685	48.9	1.80268	98.1973	69.4513	30.5487	0		46.3928	6.7134	6.7134	0	0	0	0	0	40.1804	0	0	0	0	0	0	0	0	0	0	0	0	0	7.47261	77.4202	1.60423	53.7134	63.2613	55.3189
AUS-3	Norway	Austerdalsbreen	61° 34.740'	N	6° 59.760'	E	61.579	6.996	360	Modern	Proglacial fluvial			0.891	41.2	3.16	96.84	50.389	34.1113	15.4997																								7.68821	75.4314	1.56572	52.5581	60.8409	53.5153
AUS-SED-4	Norway	Austerdalsbreen	61° 34.380'	N	6° 59.580'	E	61.573	6.993	340	Modern	Proglacial fluvial			0.863	50.6	1.78098	98.219	28.3434	68.8808	2.77573		37.1628	12.2877	22.4775	0	7.7922	0	0	8.5914	11.6883	0	0	0	0	0	0	0	0	0	0	0	0	0	7.5694	73.9488	1.69504	53.8281	62.5497	55.3084
AUS-5	Norway	Austerdalsbreen	61° 33.780'	N	6° 59.580'	E	61.563	6.993	317	Modern	Proglacial fluvial			0.831	38.1	4.03	95.97	10.0022	50.5913	39.4064																								7.62978	77.2442	1.56953	52.5633	61.0726	53.5536
AUS-SED-6	Norway	Austerdalsbreen	61° 33.420'	N	6° 59.400'	E	61.557	6.99	329	Modern	Proglacial fluvial			1.961	50.2	1.13668	98.8633	38.8615	60.1487	0.98978		28.9606	6.8618	13.8244	0	0	0	0	3.7336	46.6196	0	0	0	0	0	0	0	0	0	0	0	0	0	7.27995	78.7751	1.64052	53.9079	63.958	55.6989
AUS-7	Norway	Austerdalsbreen	61° 32.640'	N	6° 58.620'	E	61.544	6.977	288	Modern	Proglacial fluvial			0.314	46.3	2.78	97.22	21.43	70.4497	8.12035																								7.92237	71.8351	1.58018	52.6863	60.2976	53.5935
AUS-SED-8	Norway	Austerdalsbreen	61°32.475'	N	6°58.217'	E	61.5412	6.97028	251	Modern	Proglacial fluvial			1.231	49.6	1.36446	98.6355	45.5822	53.7461	0.671666		28.125	9.4758	17.8427	0	1.4113	0	0	1.9153	41.2298	0	0	0	0	0	0	0	0	0	0	0	0	0	7.61018	75.3667	1.68838	53.6404	62.6845	55.1169
AUS-SED-Lake	Norway	Austerdalsbreen	61°42'22.03"	N	6°48'8.16"	E	61.586	6.999	427	Modern	Proglacial lake			0.899	58.6	1.04397	98.956	33.5396	66.2913	0.169146		38.6613	21.2787	19.0809	0	1.7982	0	0	1.4985	17.6823	0	0	0	0	0	0	0	0	0	0	0	0	0	7.48616	75.4494	1.68449	52.9982	61.3457	54.1192
AUS-PED-10CM	Norway	Austerdalsbreen	61°32.475'	N	6°58.217'	E	61.5412	6.97028	253	Recent	Soil			7.428	51.9	4.14777	95.8522	0.836684	46.8152	52.3482		34.9798	18.8508	13.9113	0	2.5202	0	0	1.3105	19.9597	0	4.6371	0	0	0	2.3185	0	1.497	0	0	0	0	0
AUS-PED-20CM	Norway	Austerdalsbreen	61°32.475'	N	6°58.217'	E	61.5412	6.97028	253	Recent	Soil			3.339	49.3	3.84839	96.1516	0.30999	45.8766	53.8134		32.9592	8.1633	17.8571	0	2.449	0	0	3.9796	29.898	0	3.1633	0	0	0	1.5306	0	0	0	0	0	0	0
AUS-PED-30CM	Norway	Austerdalsbreen	61°32.475'	N	6°58.217'	E	61.5412	6.97028	253	Recent	Soil			3.62	47.9	3.40847	96.5915	1.07367	43.5977	55.3287		27.7387	13.6683	15.6784	0	1.206	0	0	0	34.5729	0	2.0101	0	0	0	5.1256	0	0	0	0	0	0	0
AUS-PED-50CM	Norway	Austerdalsbreen	61°32.475'	N	6°58.217'	E	61.5412	6.97028	253	Recent	Soil			8.578	59	1.04698	98.953	1.02593	44.2145	54.7596		20.5411	4.1082	8.7174	0	1.002	0	0	0	59.7194	1.503	1.7034	0	0	0	2.7054	0	0	0	0	0	0	0
AUS-PED-1M	Norway	Austerdalsbreen	61°32.475'	N	6°58.217'	E	61.5412	6.97028	253	Recent	Soil			8.968	56.4	4.17872	95.8213	0.515449	66.4835	33.001		19.9593	6.11	8.8595	0	0	0	0	1.3238	60.6925	1.5275	1.5275	0	0	0	0	0	0	0	0	0	0	0
AUS-PED-Merged	Norway	Austerdalsbreen	61°32.475'	N	6°58.217'	E	61.5412	6.97028	252	Recent	Soil		Proglacial stream cutbank soil	6.3866	52.9	3.32607	96.6739	0.752345	30.0323	69.2153		27.2356	10.1801	13.0047	0	1.4354	0	0	1.3228	40.9685	0.6061	2.6083	0	0	0	2.336	0	0.2994	0	0	0	0	0	7.44021	71.4584	1.95982	58.4971	68.866	62.1584
LANG Drift Prox	Norway	Langedalsbreen	61°33.464'	N	6°54.834'	E	61.5577	6.9139	278	Little Ice Age	Drift	wet-based ice	Langedalsbreen Till	3.126	9.6	13.6605	86.3395	1.25735	25.1952	73.5474		18.981	11.5884	7.992	0	1.8981	0	0	5.8941	45.7542	3.2967	4.5954	0	0	0	0	0	0	0	0	0	0	0	3.92985	66.7537	2.27548	68.2544	76.1064	73.0004
LANG5	Norway	Langedalsbreen	61o32.732'	N	6o57.495'	E	61.5501	6.93912		Modern	Proglacial fluvial			0.539
LANG7	Norway	Langedalsbreen	61° 32.732'	N	6° 57.495'	E	61.5455	6.95825	256	Modern	Proglacial fluvial			0.463																														7.27195	67.6347	1.3358	52.6304	58.617	53.3056
LANG9	Norway	Langedalsbreen					61.5371	6.96655		Modern	Proglacial fluvial			0.492
ELVA-1	Norway	Elvabakkane	61°30.048'	N	6°59.002'	E	61.535	6.969	248	Modern	Proglacial fluvial			1.377	56.7	3.49	96.51	7.95538	90.3845	1.66014																								7.20128	75.5848	1.42781	53.3418	61.1991	54.4963
ELVA-3	Norway	Elvabakkane	61°31.250'	N	6°59.08'	E	61.52	6.979	236	Modern	Proglacial fluvial			1.393	33.2	3.58	96.42	26.043	71.3581	2.5989																								7.18439	77.5741	1.46402	53.3553	62.0015	54.653
ELVA-5	Norway	Elvabakkane	61°30.456'	N	6°59.018'	E	61.5078	6.98363		Modern	Proglacial fluvial			1.009	46.4	2.85	97.15	9.1976	90.7589	0.0434669
ELVA-7	Norway	Elvabakkane	61°29.798'	N	6°59.104'	E	61.4966	6.98507		Modern	Proglacial fluvial			1.185	40.5	3.16	96.84	31.1054	50.9114	17.9832
ELVA-9	Norway	Elvabakkane	61°29.167'	N	6°59.960'	E	61.4861	6.99933		Modern	Proglacial fluvial			1.652	39.9	4.61	95.39	18.3256	66.833	14.8413
ELVA-11	Norway	Elvabakkane					61.4805	7.01962		Modern	Proglacial fluvial			1.22	57.4	3.18	96.82	7.4935	91.4673	1.03925
ELVA-13	Norway	Elvabakkane	61°28.126'	N	7°02.149'	E	61.4688	7.03582	170	Modern	Proglacial fluvial			0.928	43	3.18	96.82	26.4209	71.5421	2.03707																								7.41166	73.3173	1.48101	53.3731	60.9816	54.4947
VEITASTROND-LAKE-SED	Norway	Veitastrond	61°27'56.29"	N	7° 2'26.25"	E	61.4634	7.03683	172	Modern	Proglacial lake			4.25	21.9	8.70838	91.2916	93.5047	6.42656	0.0687758		19.8	6.5	9.8	0	4.1	0	0	4.6	53.8	1.4	0	0	0	0	0	0	0	0	0	0	0	0	6.96459	79.9651	1.58674	54.4407	64.9461	56.5643
EYF-1-IS	Iceland	South, Ásólfsskáli	63° 40.858'	N	19° 38.032'	W	63.681	-19.6339		Modern	Proglacial fluvial		Glacial outwash of Eyjafjallajökull	13.026	4.91	29.7226	70.2774	0.867619	44.0708	55.0616		43.9516	1.71371	0	17.7419	0	0	0	0	0	0	8.26613	0	0	0	0	0	4.93952	0	0	3.125	0	20.2621
EYF-2-IS	Iceland	South, Ásólfsskáli	63° 40.976	N	19° 38.168	W	63.6829	-19.6361	173	Modern	Proglacial fluvial		Glacial outwash of Eyjafjallajökull	12.5	52	7.09949	92.9005	35.9902	62.8004	1.20941		39.2533	0	0	22.6034	0	0	0	0	0	0	4.43996	0	0	0	0	0	3.02725	0	0	4.13724	1.10999	25.4289	5.44476	70.2567	0.653567	46.526	48.2324	46.2615
EYF-3-IS	Iceland	South, Ásólfsskáli	63° 40.178'	N	19° 37.504'	W	63.6696	-19.6251	364	Modern	Proglacial fluvial		Glacial outwash of Eyjafjallajökull	15.659	38.2	23.1381	76.8619	14.7996	69.4217	15.7787		37.9	0	0	15.4	0	0	0	0	0	0	2.4	0	0	0	2	0	1.9	0	0	2.3	0	38.1	5.78003	72.469	0.679095	46.2178	48.2906	45.8626
PM-RG-SED-1	Puerto Rico	Rio Guayanes					18.0674	-65.9912		Modern	Fluvial sediment			11.313		2.9	97.09	17.93	64.32	17.75		43.9	0	6.2	0	16.2	0	0	0	5	0	0	0	0	0	0	28.8	0	0	0	0	0	0	5.16329	59.9561	0.748348	54.8944	55.9809	55.0921
PM-RG-SED-2	Puerto Rico	Rio Guayanes					18.0691	-65.9957		Modern	Fluvial sediment			22.346		4.06	95.93	8.9	89.65	1.45		41.3	0	9.5	0	14.4	0	0	0	10.8	0	0	0	0	0	0	24.1	0	0	0	0	0	0	3.25802	48.1221	1.58233	71.5118	72.8267	72.3177
PM-RG-SED-3	Puerto Rico	Rio Guayanes					18.0747	-65.9896		Modern	Fluvial sediment			35.206		46.76	53.24	14.01	84.2	1.79		24.1	0	21.2	0	19.8	0	0	0	0	0	0	0	0	0	0	34.9	0	0	0	0	0	0	3.78454	34.5349	1.85238	75.8269	76.9917	76.6328
PM-RG-SED-4	Puerto Rico	Rio Guayanes					18.0806	-65.9838		Modern	Fluvial sediment			22.743		13.07	86.92	4.94	93.65	1.42		38.8	0	12.1	0	13.4	0	0	0	0	0	0	0	0	0	0	35.7	0	0	0	0	0	0	4.44956	47.9354	1.1046	64.0608	65.4858	64.7006
PM-RG-SED-5	Puerto Rico	Rio Guayanes					18.0813	-65.9749		Modern	Fluvial sediment			21.152		18.43	81.57	4.65	92.48	2.87		32.3	0	7.2	0	17.2	0	0	2.3	0	0	0	0	0	0	0	40.9	0	0	0	0	0	0	4.50652	46.9231	1.09915	64.302	65.7537	64.9627
PM-RG-SED-6	Puerto Rico	Rio Guayanes					18.0794	-65.9596		Modern	Fluvial sediment			22.564		5.22	94.8	7.59	92.41	0		28.4	0	11.5	0	8.8	0	0	0	0	0	0	0	0	0	0	51.2	0	0	0	0	0	0	2.48988	30.3652	3.00232	83.63	85.6192	85.2689
PM-RG-SED-7	Puerto Rico	Rio Guayanes					18.0577	-65.922		Modern	Fluvial sediment			19.687		6.42	93.58	1.93	98.03	0.05		51.1	0	14.5	0	8.4	0	0	0	0	0	0	0	0	0	0	26	0	0	0	0	0	0	3.19539	46.9491	1.60171	70.0316	72.5535	71.5282
PM-RG-SED-8	Puerto Rico	Rio Guayanes					18.0528	-65.9115		Modern	Fluvial sediment			27.289		10.9	89.1	2.02	89.66	8.32		34.9	0	14.1	0	9.3	0	0	0	0	0	0	0	0	0	0	41.8	0	0	0	0	0	0	2.5555	33.4878	2.87597	81.9874	84.0703	83.6551
PM-RG-SED-9	Puerto Rico	Rio Guayanes					18.0597	-65.8752		Modern	Fluvial sediment			20.174								40.4	0	11.4	0	7.5	0	0	0	0	0	0	0	0	0	0	40.8	0	0	0	0	0	0	3.54205	36.199	2.31182	77.7025	80.4075	79.7008
PM-RG-SED-10	Puerto Rico	Rio Guayanes					18.0569	-65.8999		Modern	Fluvial sediment			26.936								50.1	0	10.5	0	14.4	0	0	0	0	0	0	0	0	0	0	25.1	0	0	0	0	0	0	3.04221	52.8972	1.84037	70.9037	74.0789	72.8637
PM-RG-SAP-1	Puerto Rico	Rio Guayanes					18.0648	-65.995			Saprolite			8.199		0.82	99.17	27.27	59.53	13.19		72.2	0	9.2	0	11	0	0	0	0	0	0	2.2	0	0	0	5.4	0	0	0	0	0	0	5.01867	60.5276	0.79472	56.9055	57.849	57.1384
PM-RG-SAP-2	Puerto Rico	Rio Guayanes					18.0681	-65.9922			Saprolite			16.83		4.71	95.26	71.02	24.91	4.07		35.9	5	0	0	28.5	0	0	5.8	0	0	0	3.3	0	0	0	21.5	0	0	0	0	0	0	4.311	55.8231	0.900713	62.2017	63.7103	62.8082
PM-RG-SAP-3	Puerto Rico	Rio Guayanes					18.0747	-65.9896			Saprolite			16.723		3.33	96.66	17.8	72.75	9.46		22.9	0	2.7	0	3.3	0	0	3.2	0	0	0	0	0	0	0	67.9	0	0	0	0	0	0	2.05071	26.3126	5.90408	88.3504	90.6689	90.4175
PM-RG-SAP-4Red	Puerto Rico	Rio Guayanes					18.0735	-65.9882			Saprolite			25.271		10.37	89.67	33.68	66.32	0		1.3	0	0.1	0	1.7	0	0	6.6	0	0	0	0	0	0	0	81.3	0	0	0	0	0	0	2.27109	14.6226	11.5977	94.616	96.9375	96.8605
PM-RG-SAP-5A	Puerto Rico	Rio Guayanes					18.0753	-65.9338			Saprolite			8.999		12.85	87.14	11.58	84.06	4.36		24.5	5.4	1.3	1.8	14.7	0	0	1.5	0	25.2	0	0	0	0	0	21	0	4.5	0	0	0	0	3.79622	59.9743	1.06601	62.0994	64.3196	62.9966
PM-RG-SAP-5B	Puerto Rico	Rio Guayanes					18.0753	-65.9338			Saprolite			10.986		13.33	86.67	27.88	68.73	3.39		25.1	0	3.1	0	0	0	0	26	1.1	1.3	0	1.4	0	0	0	35.5	0	0	6.6	0	0	0	3.71499	60.6282	1.69009	64.2179	68.1405	66.0678
PM-RG-SAP-6A-Red	Puerto Rico	Rio Guayanes					18.0781	-65.9387			Saprolite			21.897		9.12	90.87	52.14	47.37	0.49		0	3.5	2.1	0	0	0	0	1.4	0	0	0	0	0	0	0	93	0	0	0	0	0	0	2.30021	12.0053	41.2058	96.19	99.2686	99.2444
PM-RG-SAP-6B-Yellow	Puerto Rico	Rio Guayanes					18.0781	-65.9387			Saprolite			17.507		8.98	91.01	36.3	58.48	5.22		0	17.8	0.8	0	9.5	0	0	0	0	0	0	0	0	0	0	72	0	0	0	0	0	0	2.64371	26.6868	6.39595	87.913	91.246	90.901
PM-RG-SAP-6C-Brown	Puerto Rico	Rio Guayanes					18.0781	-65.9387			Saprolite			30.46		11.49	88.53	51.69	48.22	0.09		6	13.9	0.7	0	7.1	0	0	2.9	1.6	0	0	0	0	0	0	67.7	0	0	0	0	0	0	2.67614	22.1471	7.58798	89.2366	91.4295	91.2136
PM-RB-SED-1	Puerto Rico	Rio Guayoba					18.0544	-65.9451		Modern	Fluvial sediment			15.654		5.74	94.25	7.06	91.5	1.43		25.7	0	8.4	0	11.6	0	0	19.7	3.8	0	0	0	0	0	0	30.8	0	0	0	0	0	0	3.02677	47.5385	1.80287	71.2602	73.9192	72.9083
PM-RB-SED-2	Puerto Rico	Rio Guayoba					18.0524	-65.9389		Modern	Fluvial sediment			14.211		0.95	99.05	3.7	93.7	2.6		23.2	21.2	7.6	0	8.9	0	0	0	0	0	0	0	0	0	0	39.1	0	0	0	0	0	0	2.59979	46.7778	2.10624	74.7214	77.404	76.5626
PM-RB-SED-3	Puerto Rico	Rio Guayoba					18.0503	-65.9292		Modern	Fluvial sediment			15.965		4.07	95.93	2.86	94.62	2.52		32.4	4.6	7.8	0	16.3	0	0	7.6	1.9	0	0	0	0	0	0	29.4	0	0	0	0	0	0	4.34721	59.6309	1.13399	60.8854	64.4101	62.2232
PM-RB-SED-4	Puerto Rico	Rio Guayoba					18.0491	-65.9228		Modern	Fluvial sediment			13.736		3.92	96.09	29.37	70.63	0		28.3	2.3	8.1	0	11.9	0	0	26.5	0	0	0	0	0	0	0	22.9	0	0	0	0	0	0	3.999	49.4768	1.4885	68.5829	72.2067	70.6562
RG-14-SOIL-1
RG-14-SOIL-2	Puerto Rico	Rio Guayanes									Soil																																	2.37321	24.4252	12.1179	90.8274	95.025	94.7839
RG-14-SOIL-3
RG-14-SOIL-4	Puerto Rico	Rio Guayanes									Soil																																	2.51671	22.6782	12.9944	91.3864	95.1117	94.9039
RG-14-SOIL-5
RG-14-SOIL-6	Puerto Rico	Rio Guayanes									Soil																																	2.63628	41.3905	10.6327	85.2485	92.8687	92.1687
RB-14-SED-1	Puerto Rico	Rio Guayoba					18.049	-65.9232		Modern	Fluvial sediment			15.41																														4.28934	52.2255	1.24524	63.8156	66.9863	65.2602
RB-14-SED-2	Puerto Rico	Rio Guayoba					18.0508	-65.93		Modern	Fluvial sediment			15.743																														4.3937	55.2212	1.20682	61.6076	64.6253	62.8033
RB-14-SED-3	Puerto Rico	Rio Guayoba					18.0523	-65.9389		Modern	Fluvial sediment			32.049																														4.1741	53.0225	1.29242	63.9475	67.1303	65.4086
RB-14-SED-4	Puerto Rico	Rio Guayoba					18.0544	-65.9454		Modern	Fluvial sediment																																	4.65108	51.086	1.26205	63.3304	66.7292	64.8424
RB-14-SED-5	Puerto Rico	Rio Guayoba					18.0603	-65.9518		Modern	Fluvial sediment			24.638																														3.53812	46.5567	1.57625	69.3121	72.1573	70.9655
IGNF-13-SOIL-1	South California	Anza Borrego	32º51.238'	N	116º17.282'	W	32.854	-116.288			Soil					7.30689	92.6931	4.71582	62.1409	33.1433																								5.67736	63.5389	1.47802	58.9694	63.2931	60.3888
IGNF-13-SOIL-2	South California	Anza Borrego	32º51.238'	N	116º17.282'	W	32.854	-116.288			Soil					8.20189	91.7981	5.54587	66.9204	27.5338																								5.69367	63.3965	1.4751	58.9413	63.2932	60.3669
IGNF-13-SOIL-3	South California	Anza Borrego	32º51.238'	N	116º17.282'	W	32.854	-116.288			Soil					8.74605	91.254	5.63023	63.6972	30.6726																								5.64669	64.1453	1.46552	58.8477	63.2271	60.2704
IGNF-13-SOIL-4	South California	Anza Borrego	32º51.238'	N	116º17.282'	W	32.854	-116.288			Soil					7.20524	92.7948	2.97129	78.8152	18.2135																								5.60757	67.5625	1.37943	56.7811	60.5205	57.7373
IGNF-13-SOIL-5	South California	Anza Borrego	32º51.238'	N	116º17.282'	W	32.854	-116.288			Soil					8.31579	91.6842	1.43055	68.5827	29.9868																								5.6679	67.1088	1.38032	56.6528	60.3433	57.5799
IGNF-13-SOIL-6	South California	Anza Borrego	32º51.238'	N	116º17.282'	W	32.854	-116.288			Soil					6.63812	93.3619	3.88007	69.6203	26.4996																								5.54896	67.7458	1.40586	57.0967	61.0315	58.1472
IGNF-13-SOIL-7	South California	Anza Borrego	32º51.238'	N	116º17.282'	W	32.854	-116.288			Soil					7.56124	92.4388	1.16688	70.4188	28.4143																								5.87244	64.966	1.38356	56.926	60.6961	57.9085
IGNF-13-SED-1	South California	Anza Borrego	32º51.221'	N	116º17.314'	W	32.8537	-116.289		Modern	Fluvial sediment			15.9	34.58	20.9775	79.0225	3.23988	57.9415	38.8186		54.8	11.1	16.6	0	0	0	0	4.2	9.1	0	0	0	0	0	0	4.2	0	0	0	0	0	0	5.60678	63.7985	1.46514	59.1656	63.5446	60.6308
IGNF-13-SED-5	South California	Anza Borrego	32º51.439'	N	116º16.384'	W	32.8573	-116.273		Modern	Fluvial sediment			19.1	41.68	28.5114	71.4886	2.46362	70.66	26.8764																								5.67736	61.0698	1.55063	61.4962	66.8346	63.6819
IGNF-13-SED-7	South California	Anza Borrego	32º51.570'	N	116º15.794'	W	32.8595	-116.263		Modern	Fluvial sediment			17.6	55.13	15.7474	84.2526	3.91217	57.5874	38.5004		59.4	5.7	14	0	0	0	0	5	11.2	0	0	0	0	0	0	4.6	0.4	0	0	0	0	0	5.3047	64.2546	1.5409	61.0322	66.0126	62.9927
IGNF-13-SED-11	South California	Anza Borrego	32º51.821'	N	116º14.665'	W	32.8637	-116.244		Modern	Fluvial sediment			14.2	41.68	21.936	78.064	3.6274	60.7078	35.6648		55.2	4.6	17.9	0	0	0	0	12.1	2.5	0	4.3	0	0	0	0	2.6	0.9	0	0	0	0	0	5.73302	63.65	1.48359	60.0092	65.177	61.8956
IGNF-13-SED-13	South California	Anza Borrego	32º52.112'	N	116º14.299'	W	32.8685	-116.238		Modern	Fluvial sediment			11	50.22	17.9223	82.0777	4.12018	67.4351	28.4447		62.9	4.5	17.7	0	0	0	0	6.8	7.5	0	0	0	0	0	0	0.6	0	0	0	0	0	0	5.7249	66.1442	1.3812	58.4401	63.274	59.9623
IGNF-13-SED-15	South California	Anza Borrego	32º52.310'	N	116º13.119'	W	32.8718	-116.219		Modern	Fluvial sediment			17.6	50.22	23.0653	76.9347	3.19227	71.2511	25.5566		39.4	6.6	16	0	0	0	0	11.6	22.4	0	0	0	0	0	0	3	1.1	0	0	0	0	0	5.53938	61.0684	1.49122	63.7206	70.7627	67.1301
W10-CG-1-BR	Antarctica	Wright Valley									Bedrock
W10-CG-2-BR	Antarctica	Wright Valley									Bedrock
W10-CG-3-BR	Antarctica	Wright Valley									Bedrock
W10-CG-4-BR	Antarctica	Wright Valley									Bedrock
W10-CG-5-BR	Antarctica	Wright Valley									Bedrock
W10-CG-6-BR	Antarctica	Wright Valley									Bedrock
W10-CG-7-BR	Antarctica	Wright Valley									Bedrock
W10-CG-8-BR	Antarctica	Wright Valley									Bedrock
W10-CG-9-BR	Antarctica	Wright Valley									Bedrock
W10-CG-10-BR	Antarctica	Wright Valley									Bedrock
W10-CG-11-BR	Antarctica	Wright Valley									Bedrock
W10-CG-12-BR	Antarctica	Wright Valley									Bedrock
W10-CG-13-BR	Antarctica	Wright Valley									Bedrock
W10-CG-14-BR	Antarctica	Wright Valley									Bedrock
W10-CG-15-BR	Antarctica	Wright Valley									Bedrock
W10-CG-16-BR	Antarctica	Wright Valley									Bedrock
W10-CG-17-BR	Antarctica	Wright Valley									Bedrock
W10-CG-18-BR	Antarctica	Wright Valley									Bedrock
W10-CG-19-BR	Antarctica	Wright Valley									Bedrock
W10-CG-20-BR	Antarctica	Wright Valley									Bedrock
W10-DG-1-BR	Antarctica	Taylor Valley									Bedrock
W10-GG-1-BR	Antarctica	Taylor Valley									Bedrock
W10-GG-2-BR	Antarctica	Taylor Valley									Bedrock
T10-MG-1-BR	Antarctica	Taylor Valley									Bedrock
T10-MS-1-BR	Antarctica	Taylor Valley									Bedrock
T10-MS-2-BR	Antarctica	Taylor Valley									Bedrock
T10-RD-1-BR	Antarctica	Taylor Valley									Bedrock
T10-RD-2-BR	Antarctica	Taylor Valley									Bedrock
T10-DK-1-BR	Antarctica	Taylor Valley									Bedrock
T10-DK-2-BR	Antarctica	Taylor Valley									Bedrock
T10-GOLD-1-BR	Antarctica	Taylor Valley									Bedrock
T10-GOLD-2-BR	Antarctica	Taylor Valley									Bedrock
T10-GOLD-3-BR	Antarctica	Taylor Valley									Bedrock
T10-GOLD-4-BR	Antarctica	Taylor Valley									Bedrock
T10-GOLD-5-BR	Antarctica	Taylor Valley									Bedrock
T10-GOLD-6-BR	Antarctica	Taylor Valley									Bedrock
T10-CC-1-BR	Antarctica	Taylor Valley									Bedrock
RB-14-BDRK-#2A	Puerto Rico	Puerto Rico									Bedrock
RG-14-BDRK-13	Puerto Rico	Puerto Rico									Bedrock
RG-14-BDRK-13amp	Puerto Rico	Puerto Rico									Bedrock
IGNF-13-BDRK-1B Float	Anza Borrego	Anza Borrego									Bedrock
IGNF-13-BDRK-1	Anza Borrego	Anza Borrego									Bedrock
IGNF-13-BDRK2	Anza Borrego	Anza Borrego									Bedrock
BDRK-Weathered-O	Anza Borrego	Anza Borrego									Bedrock
BDRK-Weathered-1	Anza Borrego	Anza Borrego									Bedrock
BDRK-Fresh	Anza Borrego	Anza Borrego									Bedrock
PERU-GR BDRK	Peru	Peru									Bedrock
Gordon et al. 2013 granitic leucosome (NW10-06)	Norway										Bedrock
Gorgon et al. 2013 granodioritic leucosome (NW10-12)	Norway	Nordfjord									Bedrock
Gordon et al. 2013 eclogite-margin (NW10-36D)	Norway	Remøya									Bedrock
Gordon et al. 2013 granodioritic leucosome (NW10-45E)	Norway	Tangen									Bedrock
Gordon et al. 2013 granitic pegmatite (NW10-55)	Norway	Finnøya									Bedrock
Kelly et al. 2014 Fimmvörðuháls lava flow	Iceland	Iceland									Bedrock
USGS Mount Stuart granodiorite	Washington	Washington									Bedrock
USGS acidic dike W Mount Stuart	Washington	Washington									Bedrock
[truncated: 58 more columns]
